# Supplementary material for: Multiple symptoms of total ozone recovery inside the Antarctic vortex during austral spring
Source: Copernicus journal article supplement (doi:10.5194/acp-18-7557-2018), 2018-05-31
Supplement: Supplementary file 1 [file acp-18-7557-2018-supplement.pdf]

Supplement of Atmos. Chem. Phys., 18, 7557–7572, 2018  
<https://doi.org/10.5194/acp-18-7557-2018-supplement>  
© Author(s) 2018. This work is distributed under  
the Creative Commons Attribution 4.0 License.

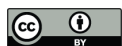

*Supplement of*

## **Multiple symptoms of total ozone recovery inside the Antarctic vortex during austral spring**

**Andrea Pazmiño et al.**

*Correspondence to:* Andrea Pazmiño ([andrea.pazmino@latmos.ipsl.fr](mailto:andrea.pazmino@latmos.ipsl.fr))

The copyright of individual parts of the supplement might differ from the CC BY 4.0 License.

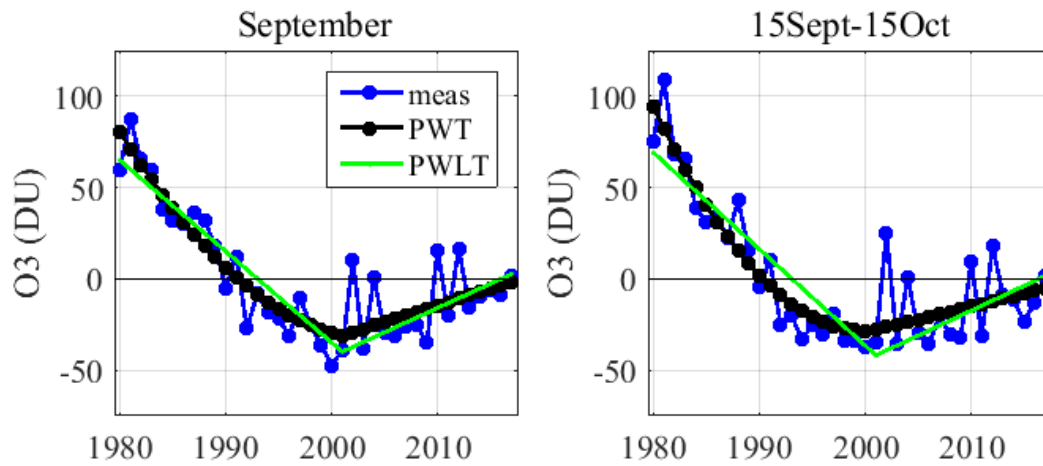

Figure S1: Deseasonalised average ozone inside the vortex of MSR-2 series for September (left panel) and 15Sept-15Oct period (right panel) using 400 K-600 K classification range. Regressed trends obtained by MLR analysis using PWT and PWLT as proxies are also shown.

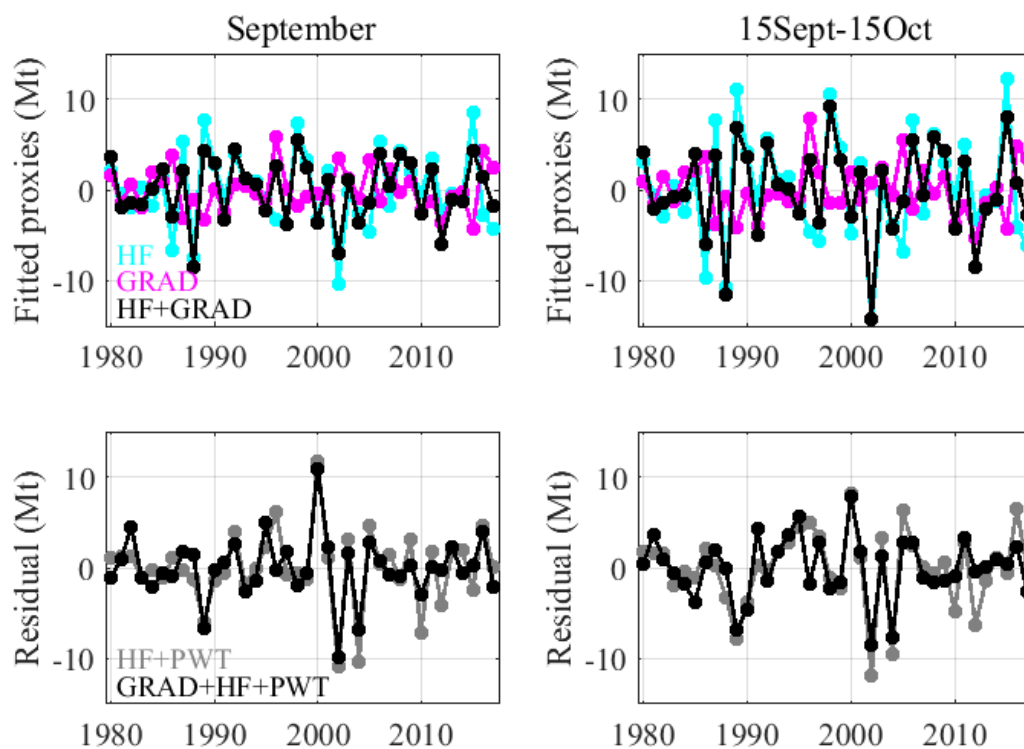

Figure S2: Fitted Heat Flux - HF, gradient - GRAD and the combination of both HF+GRAD proxies for September and 15Sept-15Oct periods (top panels) using MLR analysis on OMD. Corresponding residuals (in Mt) with and without contribution of GRAD proxy are shown in bottom panels.

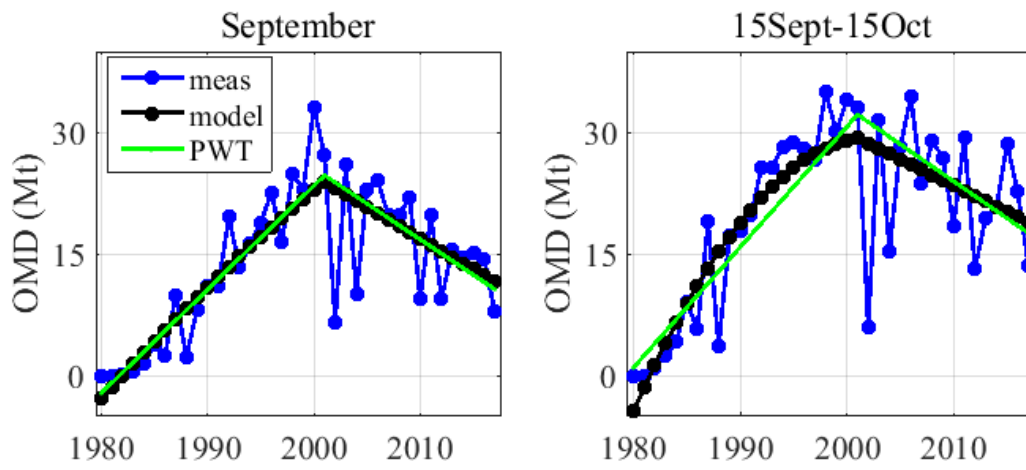

Figure S3: Deseasonalised mean OMD of MSR-2 series for September (left panel) and 15Sept-15Oct period (right panel). Regressed trends obtained by MLR analysis using PWT and PWLT as proxies are also shown.
